# Supplementary material
Source: PubMed Central journal article supplement (PMC3028642)
Supplement: supp_31_4_674__1.pdf [file supp_31_4_674__1.pdf]

pCM184-LAUR

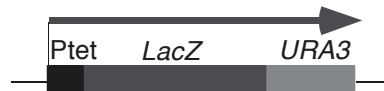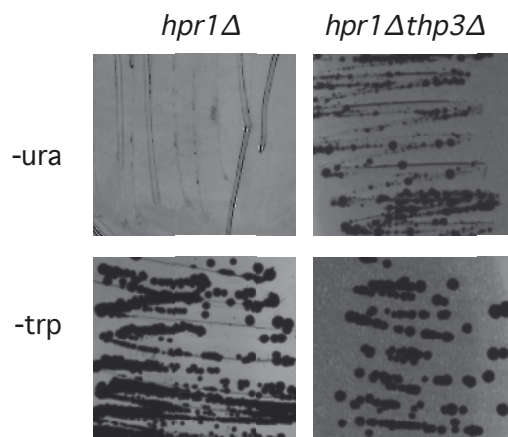

Jimeno\_Fig.S1

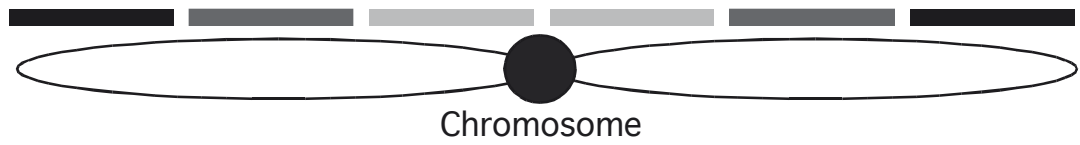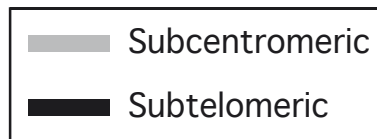

Jimeno\_Fig.S2

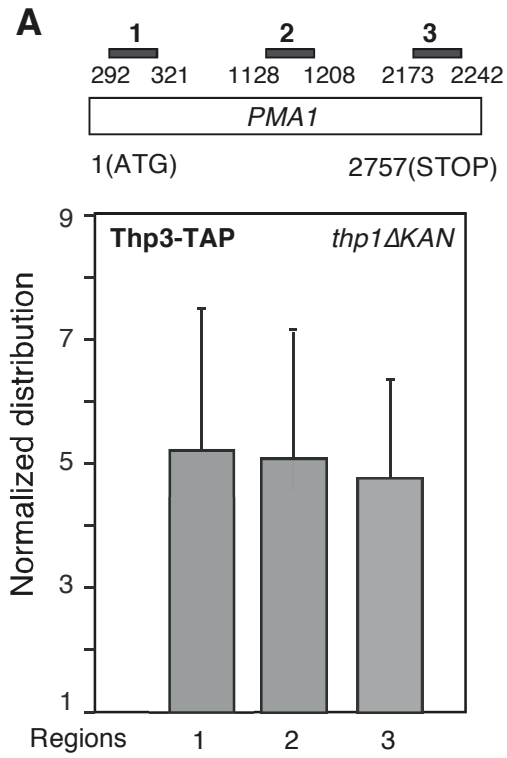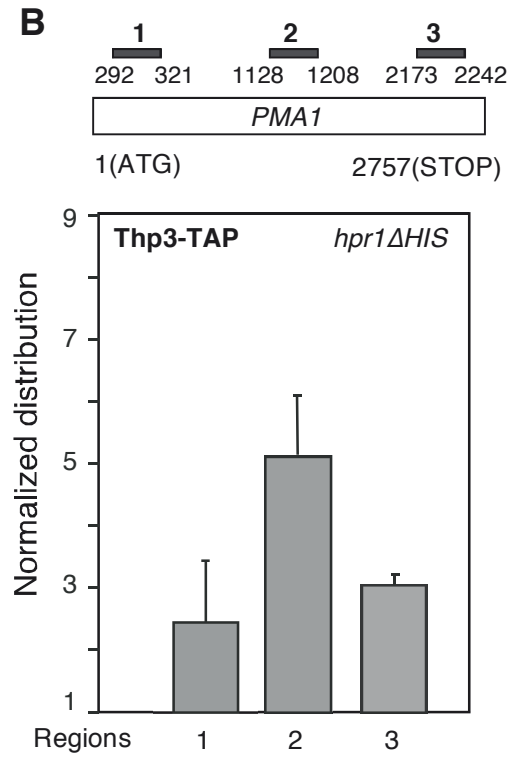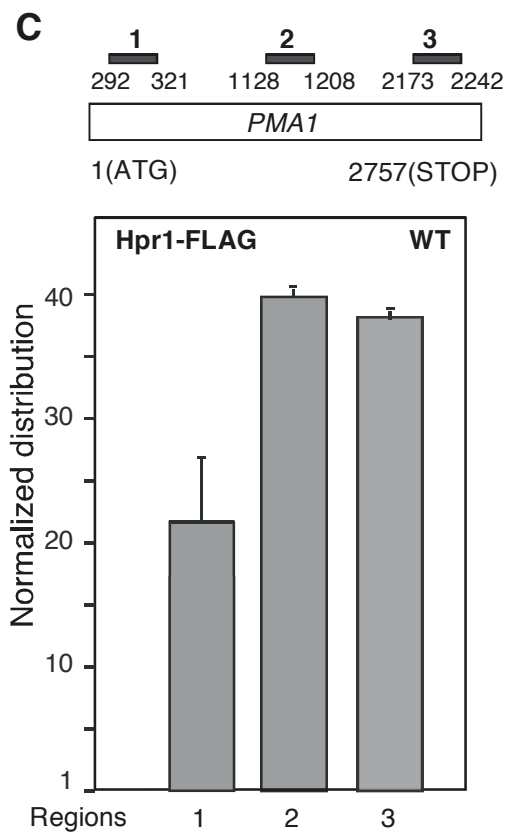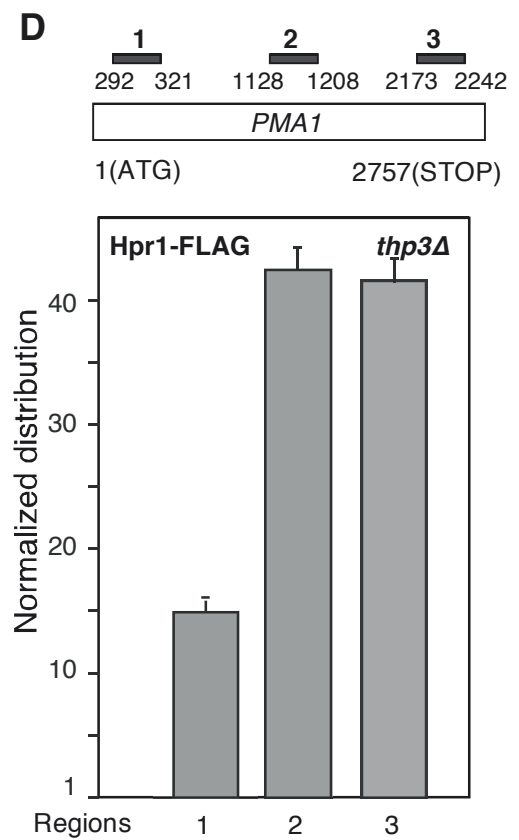

Jimeno\_Fig.S3

## SUPPLEMENTARY FIGURE LEGENDS

FIG. S1. Suppression of the gene expression phenotype of *hpr1*Δ by *thp3*Δ null mutation. Phenotypic analysis of *hpr1*Δ (U678-1C) and *hpr1*Δ *thp3*Δ (BWMN-3B) congenic strains, transformed with the pLAUR system. The capacity of each strain to form colonies on synthetic medium lacking uracil after four days at 30°C is shown. A scheme of the pLAUR system is shown on top.

FIG. S2. Schematic representation of a chromosome indicating what we have considered sub-centromeric and subtelomeric genes. We have divided each chromosomal arm into three equal parts. Genes that map on the centromeric-distal part are considered sub-telomeric while the genes that map on the proximal one are considered sub-centromeric.

FIG. S3. Recruitment of Thp3-TAP and Hpr1-FLAG to transcribed chromatin in *thp1*Δ and *hpr1*Δ and *thp3*Δ mutants. (A) ChIP analysis at the endogenous *PMA1* gene in *thp1*Δ (BTHT-1D) and *hpr1*Δ (BTHH-6C) mutant strains carrying a TAP-tagged Thp3. Other details as in Fig. 6A (B) ChIP analysis of Hpr1-FLAG in wild-type (SYHPR1) and *thp3*Δ (SYTHP3) congenic strains. Other details as in A.

**Table S1.** Genes down-regulated in *thp3Δ* mutant. The fold decreases in mRNA levels compared with the wild type, the ORF names and the gene names are shown.

| ORF       | Gene      | Decrease | ORF       | Gene      | Decrease |
|-----------|-----------|----------|-----------|-----------|----------|
| YAR031W   | PRM9      | -1.80    | YIR014W   | YIR014W   | -1.85    |
| YAR068W   | YAR068W   | -1.82    | YIR018C-A | YIR018C-A | -1.54    |
| YAR071W   | PHO11     | -2.65    | YIR030C   | DCG1      | -1.64    |
| YBL098W   | BNA4      | -1.72    | YKL218C   | SRY1      | -1.98    |
| YBR005W   | RCR1      | -1.50    | YKL043W   | PHD1      | -1.56    |
| YBR056W-A | YBR056W-A | -2.01    | YLR040C   | YLR040C   | -2.45    |
| YBR066C   | NRG2      | -1.75    | YLR042C   | YLR042C   | -1.51    |
| YBR072W   | HSP26     | -1.72    | YLR046C   | YLR046C   | -1.54    |
| YBR093C   | PHO5      | -4.59    | YLR054C   | OSW2      | -1.83    |
| YBR157C   | ICS2      | -1.62    | YLR142W   | PUT1      | -2.21    |
| YCL027W   | FUS1      | -1.95    | YLR231C   | BNA5      | -2.10    |
| YCL026C-B | HBN1      | -1.58    | YLR346C   | YLR346C   | -2.39    |
| YDL039C   | PRM7      | -3.40    | YLR367W   | RPS22B    | -4.91    |
| YDL038C   | YDL038C   | -4.15    | YML123C   | PHO84     | -95.90   |
| YDL037C   | BSC1      | -6.21    | YML058W-A | HUG1      | -2.07    |
| YDR281C   | PHM6      | -3.93    | YML007C-A | YML007C-A | -1.72    |
| YDR381C-A | YDR381C-A | -1.54    | YMR006C   | PLB2      | -2.27    |
| YDR428C   | BNA7      | -1.51    | YMR013W-A | YMR013W-A | -2.3     |
| YDR453C   | TSA2      | -1.65    | YMR040W   | YET2      | -1.80    |
| YDR539W   | YDR539W   | -3.98    | YMR081C   | ISF1      | -1.71    |
| YER011W   | TIR1      | -2.74    | YMR084W   | YMR084W   | -1.98    |
| YER058W   | PET117    | -1.63    | YMR173W   | DDR48     | -1.85    |
| YER060W   | FCY21     | -1.98    | YMR266W   | RSN1      | -1.68    |
| YFL065C   | YFL065C   | -1.71    | YNL217W   | YNL217W   | -1.62    |
| YGR197C   | SNG1      | -1.88    | YNL093W   | YPT53     | -2.00    |
| YGR249W   | MGA1      | -1.69    | YNL040W   | YNL040W   | -4.49    |
| YHR092C   | HXT4      | -1.62    | YNL009W   | IDP3      | -1.50    |
| YHR136C   | SPL2      | -15.20   | YNR044W   | AGA1      | -2.79    |
| YHR140W   | YHR140W   | -1.53    | YNR050C   | LYS9      | -1.56    |

| <b>ORF</b> | <b>Gene</b> | <b>Decrease</b> |
|------------|-------------|-----------------|
| YNR060W    | FRE4        | -3.62           |
| YOL158C    | ENB1        | -3              |
| YOL058W    | ARG1        | -3.05           |
| YOL014W    | YOL014W     | -1.7            |
| YOL013W-B  | YOL013W-B   | -1.51           |
| YOR049C    | RSB1        | -1.79           |
| YOR071C    | NRT1        | -1.52           |
| YOR072W-B  | YOR072W-B   | -1.92           |
| YOR236W    | DFR1        | -1.55           |
| YOR306C    | MCH5        | -2.27           |
| YOR315W    | SFG1        | -1.88           |
| YOR385W    | YOR385W     | -1.78           |
| YPL156C    | PRM4        | -1.60           |
| YPL134C    | ODC1        | -1.51           |
| YPL019C    | VTC3        | -2.44           |
| YPR043W    | RPL43A      | -4.98           |
| YPR108W-A  | YPR108W-A   | -2.17           |
| YPR116W    | YPR116W     | -1.7            |

1 **Table S2.** Genes down-regulated in *thp3Δ*, *tho2* and *thp1Δ* mutants. The ORF names, gene  
 2 names and relative chromosomal localizations are shown.

| <b>ORF</b> | <b>Gene name</b> | <b>Localization</b> |
|------------|------------------|---------------------|
| YBL098W    | BNA4             | Subtelomeric        |
| YBR005W    | RCR1             | Subcentromeric      |
| YBR093C    | PHO5             | Medial              |
| YDL037C    | BSC1             | Subcentromeric      |
| YDL038C    | YDL038C          | Subcentromeric      |
| YDL039C    | PRM7             | Subcentromeric      |
| YDR428C    | BNA7             | Subtelomeric        |
| YDR453C    | TSA2             | Subtelomeric        |
| YDR539W    | YDR539W          | Subtelomeric        |
| YER058W    | PET117           | Subcentromeric      |
| YER060W    | FCY21            | Subcentromeric      |
| YKL218C    | SRY1             | Subtelomeric        |
| YLR040C    | YLR040C          | Subcentromeric      |
| YLR142W    | PUT1             | Subcentromeric      |
| YML123C    | PHO84            | Subtelomeric        |
| YMR006C    | PLB2             | Subcentromeric      |
| YMR040W    | YET2             | Subcentromeric      |
| YNL040W    | YNL040W          | Subcentromeric      |
| YNL217W    | YNL217W          | Subcentromeric      |
| YNR060W    | FRE4             | Subtelomeric        |
| YOL014W    | YOL014W          | Subcentromeric      |
| YOL158C    | ENB1             | Subtelomeric        |
| YOR236W    | DFR1             | Medial              |
| YOR315W    | SFG1             | Subtelomeric        |
| YOR385W    | YOR385W          | Subtelomeric        |
| YPL019C    | VTC3             | Subcentromeric      |

3
